# Supplementary material for: Characteristics of Adult Psychiatric Patients With Stays of 24 Hours or More in the Emergency Department
Source: Atypon-hosted journal article supplement (doi:10.1176/appi.ps.201000563), 2012-01-25
Supplement: pss6303_0283_ds.pdf [file pss6303_0283_ds.pdf]

Appendix I. Hospital Characteristics

| Hospital                                                 | 1                        | 2              | 3               | 4                             | 5                             |
|----------------------------------------------------------|--------------------------|----------------|-----------------|-------------------------------|-------------------------------|
| Type                                                     | Academic                 | Community      | Academic        | Community                     | Community                     |
| Beds                                                     |                          |                |                 |                               |                               |
| Total                                                    | 777                      | 150            | 900             | 248                           | 289                           |
| Adult psychiatry                                         | 0                        | 24             | 24              | 26                            | 43                            |
| Emergency                                                | 43                       | 16             | 49              | 35                            | 36                            |
| Psychiatry ( $\psi$ ) emergency department service model |                          |                |                 |                               |                               |
| Initial evaluation <sup>1</sup>                          | MD                       | MD             | $\psi$ nurse    | MD                            | MD                            |
| Psychiatric assessment                                   | $\psi$ team <sup>2</sup> | $\psi$ team    | $\psi$ team     | $\psi$ clinician <sup>3</sup> | $\psi$ clinician <sup>4</sup> |
| Disposition                                              | $\psi$ team              | $\psi$ team    | $\psi$ team     | $\psi$ clinician              | $\psi$ clinician              |
| Psychiatric consultations in the emergency department    |                          |                |                 |                               |                               |
| Annual number                                            | 920                      | 1009           | 5229            | 3799                          | 2930                          |
| Number in study                                          | 220                      | 224            | 204             | 213                           | 215                           |
| Estimated per cent <sup>5</sup>                          | 61                       | 75             | 40              | 31                            | 31                            |
| Mean hours per consult                                   | 14.9 $\pm$ 14.8          | 11.9 $\pm$ 8.6 | 12.3 $\pm$ 13.1 | 11.9 $\pm$ 8.5                | 6.4 $\pm$ 4.3                 |
| Median hours per consult                                 | 11.3                     | 9.3            | 7.9             | 9.1                           | 5.1                           |

<sup>1</sup> Medical clearance is completed by the emergency department physician at all hospitals except for Hospital 3

<sup>2</sup> Members include psychiatric trainees, fellows, and the attending physician

<sup>3</sup> Master's level clinician (e.g., social worker) who presents the patient to an attending psychiatrist, who may or may not see the patient

<sup>4</sup> Master's level clinician (e.g., social worker) completes the initial assessment which is completed by an attending psychiatrist

<sup>5</sup> This is the estimated percentage that the study sample represented of all psychiatric consultations for the time period.
